# Supplementary material for: Hemin-doped metal–organic frameworks based nanozyme electrochemical sensor with high stability and sensitivity for dopamine detection
Source: Royal Society of Chemistry journal article supplement (doi:10.1039/d0ra08224d), 2021-01-01
Supplement: d0ra08224d1.pdf [file d0ra08224d1.pdf]

## Supplementary Material

### Hemin-Doped Metal-Organic Frameworks Based Nanozyme Electrochemical Sensor with High Stability and Sensitivity for Dopamine Detection

Kai Kang <sup>1</sup>, Beibei Wang <sup>1</sup>, Xueping Ji <sup>1,2\*</sup>, Yuheng Liu <sup>1</sup>, Wenrui Zhao <sup>1</sup>, Yaqing Du<sup>1</sup>, Zhiyong Guo <sup>3</sup>, JujieRen <sup>4\*</sup>

<sup>1</sup> School of Pharmacy, Hebei Medical University, Shijiazhuang 050017, PR China Corresponding author. Tel.: +86-311-86265593. E-mail address: xuepingji@126.com, jujieren@126.com

<sup>2</sup> Hebei Key Laboratory of Forensic Medicine, Shijiazhuang 050017, PR China

<sup>3</sup> School of Materials Science and Chemical Engineering, Ningbo University, Ningbo 315211, PR China

<sup>4</sup> Department of Chemistry, School of Sciences, Hebei University of Science and Technology, Shijiazhuang 050018, PR China

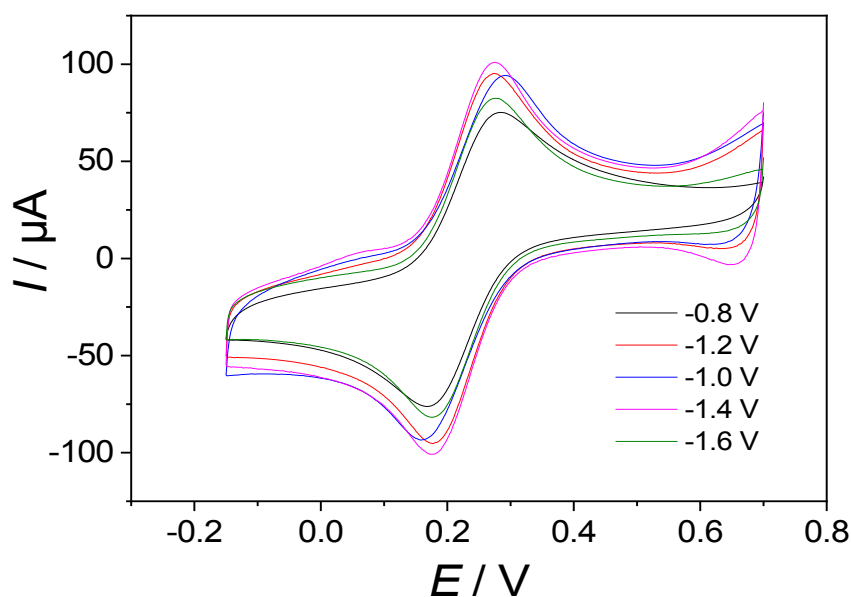

Fig. S1 CVs of rGO/GCE with different deposition potentials in 5 mM  $[\text{Fe}(\text{CN})_6]^{3-/4-}$  solution containing 0.1 M KCl and 0.1 M PBS. (-0.8 V, -1.0 V, -1.2 V, -1.4 V, -1.6 V)

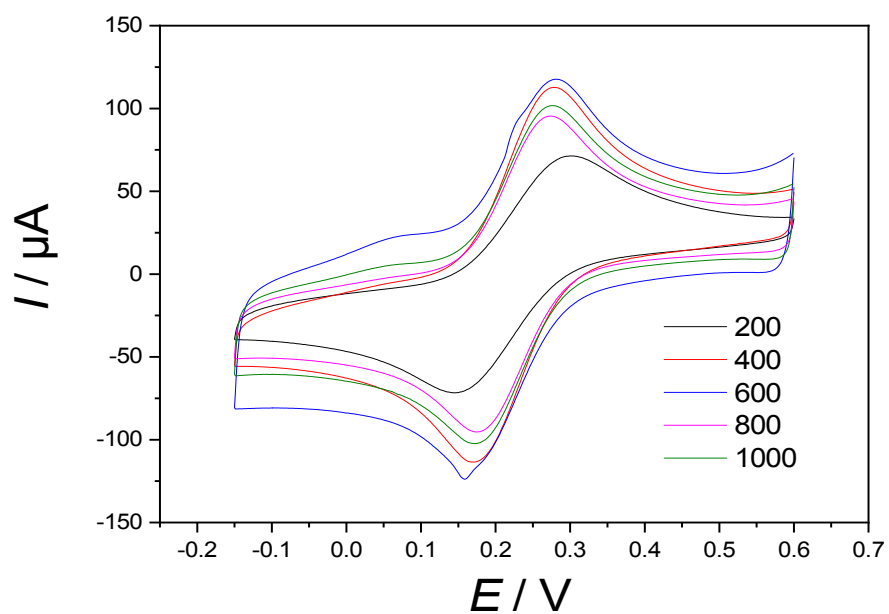

Fig. S2 CVs of rGO/GCE with different deposition times in 5 mM  $[\text{Fe}(\text{CN})_6]^{3-/4-}$  solution containing 0.1 M KCl and 0.1 M PBS. (200s, 400s, 600s, 800s, 1000s)

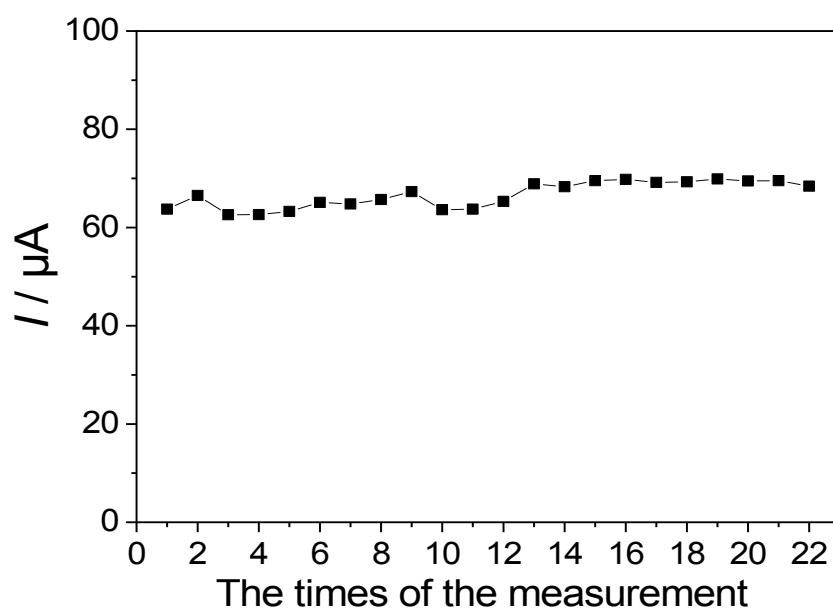

Fig. S3 Calibration plots of the redox peak currents of 22 continuous determinations

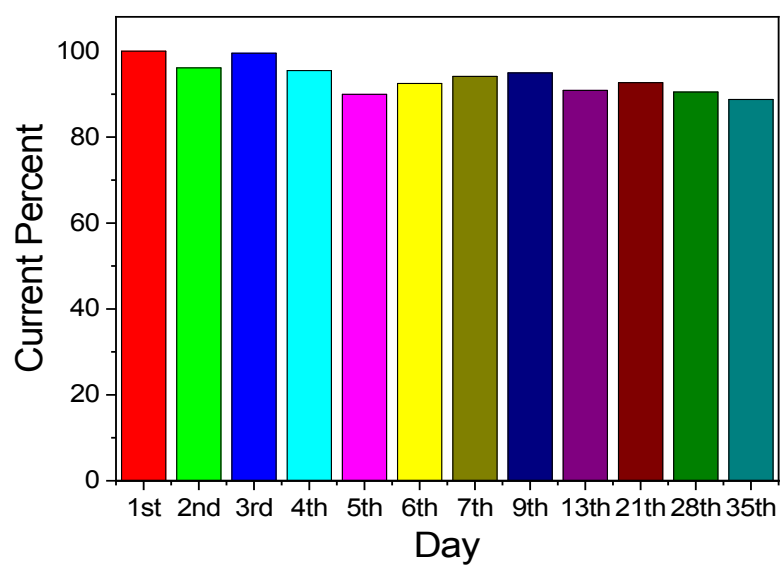

Fig. S4 Comparison of relative response signal obtained from different days.

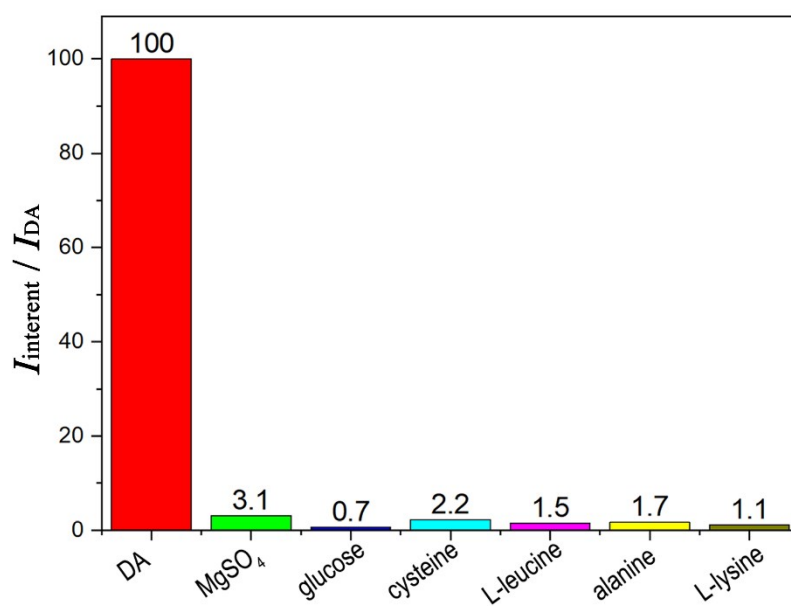

Fig. S5 The ratios of the current value changed after adding each interference substances to the current value with 0.1M DA.

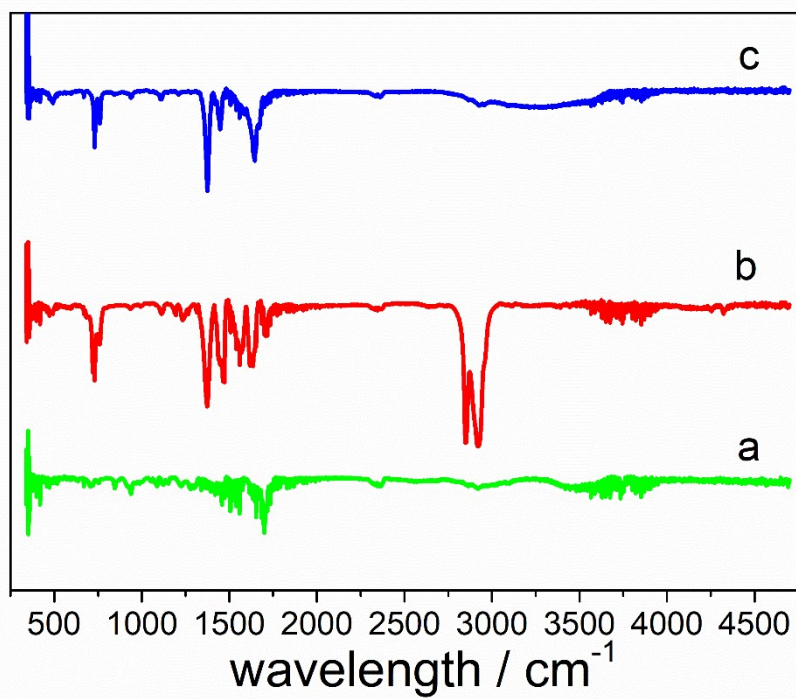

Fig. S6 IR spectrum of (a) hemin, (b) HKUST-1, and (c) Hemin-doped-HKUST-1.
